# Supplementary material for: Continuous-flow organic electrosynthesis of a conjugated bipolar polymer cathode for high-performance low-temperature aqueous aluminum-ion batteries
Source: Royal Society of Chemistry journal article supplement (doi:10.1039/d5ee06706e), 2026-01-01
Supplement: d5ee06706e2.xlsx [file d5ee06706e2.xlsx]

## Sheet: Sheet1
0.726	5.09854e-06
0.725	4.61977e-06
0.724	4.16963e-06
0.723	3.74813e-06
0.722	3.35527e-06
0.721	2.99104e-06
0.72	2.65546e-06
0.719	2.3485e-06
0.718	2.07019e-06
0.717	1.82051e-06
0.716	1.59947e-06
0.715	1.57705e-06
0.714	1.4756e-06
0.713	1.35248e-06
0.712	1.23522e-06
0.711	1.11945e-06
0.71	1.00758e-06
0.709	8.99143e-07
0.708	7.91162e-07
0.707	6.80272e-07
0.706	5.70064e-07
0.705	4.78935e-07
0.704	3.86e-07
0.703	2.89141e-07
0.702	1.9348e-07
0.701	9.55737e-08
0.7	-2.15917e-09
0.699	-8.92298e-08
0.698	-1.61697e-07
0.697	-2.32756e-07
0.696	-3.07031e-07
0.695	-3.75135e-07
0.694	-4.52351e-07
0.693	-5.30137e-07
0.692	-6.07831e-07
0.691	-7.48291e-07
0.69	-8.22177e-07
0.689	-8.62537e-07
0.688	-8.89558e-07
0.687	-9.26998e-07
0.686	-9.40025e-07
0.685	-9.47822e-07
0.684	-9.54891e-07
0.683	-9.67149e-07
0.682	-9.82007e-07
0.681	-1.00437e-06
0.68	-1.02289e-06
0.679	-1.05382e-06
0.678	-1.09496e-06
0.677	-1.14637e-06
0.676	-1.21527e-06
0.675	-1.30402e-06
0.674	-1.4104e-06
0.673	-1.5191e-06
0.672	-1.64956e-06
0.671	-1.80909e-06
0.67	-1.86758e-06
0.669	-1.93553e-06
0.668	-2.00849e-06
0.667	-2.0833e-06
0.666	-2.13773e-06
0.665	-2.19612e-06
0.664	-2.25461e-06
0.663	-2.31669e-06
0.662	-2.38221e-06
0.661	-2.44175e-06
0.66	-2.50322e-06
0.659	-2.56892e-06
0.658	-2.64008e-06
0.657	-2.71461e-06
0.656	-2.78449e-06
0.655	-2.8471e-06
0.654	-2.89986e-06
0.653	-2.95129e-06
0.652	-3.02463e-06
0.651	-3.08838e-06
0.65	-3.13093e-06
0.649	-3.16808e-06
0.648	-3.20692e-06
0.647	-3.25084e-06
0.646	-3.30233e-06
0.645	-3.35361e-06
0.644	-3.41838e-06
0.643	-3.48146e-06
0.642	-3.5422e-06
0.641	-3.64155e-06
0.64	-3.71999e-06
0.639	-3.78083e-06
0.638	-3.83041e-06
0.637	-3.86747e-06
0.636	-3.88842e-06
0.635	-3.90582e-06
0.634	-3.92342e-06
0.633	-3.944e-06
0.632	-3.96938e-06
0.631	-4.00218e-06
0.63	-4.00507e-06
0.629	-4.01298e-06
0.628	-4.02891e-06
0.627	-4.05673e-06
0.626	-4.10164e-06
0.625	-4.16448e-06
0.624	-4.24394e-06
0.623	-4.32596e-06
0.622	-4.42153e-06
0.621	-4.53954e-06
0.62	-4.61484e-06
0.619	-4.69393e-06
0.618	-4.77767e-06
0.617	-4.86887e-06
0.616	-4.96179e-06
0.615	-5.05805e-06
0.614	-5.15613e-06
0.613	-5.24685e-06
0.612	-5.33311e-06
0.611	-5.42143e-06
0.61	-5.4717e-06
0.609	-5.55153e-06
0.608	-5.6148e-06
0.607	-5.66735e-06
0.606	-5.72551e-06
0.605	-5.78224e-06
0.604	-5.83559e-06
0.603	-5.88983e-06
0.602	-5.92931e-06
0.601	-5.96064e-06
0.6	-5.98513e-06
0.599	-6.00829e-06
0.598	-6.04025e-06
0.597	-6.0675e-06
0.596	-6.09601e-06
0.595	-6.12238e-06
0.594	-6.15266e-06
0.593	-6.17966e-06
0.592	-6.21585e-06
0.591	-6.25786e-06
0.59	-6.3087e-06
0.589	-6.36366e-06
0.588	-6.39662e-06
0.587	-6.42696e-06
0.586	-6.4618e-06
0.585	-6.49242e-06
0.584	-6.5215e-06
0.583	-6.54495e-06
0.582	-6.55147e-06
0.581	-6.55337e-06
0.58	-6.55565e-06
0.579	-6.5638e-06
0.578	-6.56857e-06
0.577	-6.56032e-06
0.576	-6.55528e-06
0.575	-6.55466e-06
0.574	-6.56074e-06
0.573	-6.56418e-06
0.572	-6.63491e-06
0.571	-6.641e-06
0.57	-6.61989e-06
0.569	-6.5757e-06
0.568	-6.51946e-06
0.567	-6.45096e-06
0.566	-6.38566e-06
0.565	-6.3248e-06
0.564	-6.26602e-06
0.563	-6.21542e-06
0.562	-6.17269e-06
0.561	-6.13878e-06
0.56	-6.11574e-06
0.559	-6.11205e-06
0.558	-6.11358e-06
0.557	-6.11656e-06
0.556	-6.12803e-06
0.555	-6.1498e-06
0.554	-6.17901e-06
0.553	-6.22079e-06
0.552	-6.28351e-06
0.551	-6.24836e-06
0.55	-6.22316e-06
0.549	-6.19869e-06
0.548	-6.18313e-06
0.547	-6.1605e-06
0.546	-6.13765e-06
0.545	-6.10875e-06
0.544	-6.08098e-06
0.543	-6.06743e-06
0.542	-6.05443e-06
0.541	-6.03914e-06
0.54	-6.01662e-06
0.539	-6.00048e-06
0.538	-5.97066e-06
0.537	-5.93102e-06
0.536	-5.89247e-06
0.535	-5.85633e-06
0.534	-5.81973e-06
0.533	-5.78995e-06
0.532	-5.76428e-06
0.531	-5.73093e-06
0.53	-5.70963e-06
0.529	-5.69521e-06
0.528	-5.68636e-06
0.527	-5.67078e-06
0.526	-5.65183e-06
0.525	-5.64423e-06
0.524	-5.64498e-06
0.523	-5.65318e-06
0.522	-5.65398e-06
0.521	-5.64688e-06
0.52	-5.64273e-06
0.519	-5.64688e-06
0.518	-5.68461e-06
0.517	-5.70505e-06
0.516	-5.70044e-06
0.515	-5.66968e-06
0.514	-5.62453e-06
0.513	-5.57456e-06
0.512	-5.51906e-06
0.511	-5.46058e-06
0.51	-5.40547e-06
0.509	-5.36443e-06
0.508	-5.31854e-06
0.507	-5.27798e-06
0.506	-5.24349e-06
0.505	-5.22724e-06
0.504	-5.22197e-06
0.503	-5.23207e-06
0.502	-5.25929e-06
0.501	-5.29997e-06
0.5	-5.36655e-06
0.499	-5.45662e-06
0.498	-5.56596e-06
0.497	-5.62745e-06
0.496	-5.67362e-06
0.495	-5.71574e-06
0.494	-5.76232e-06
0.493	-5.8096e-06
0.492	-5.85866e-06
0.491	-5.91682e-06
0.49	-5.97688e-06
0.489	-6.04202e-06
0.488	-6.09494e-06
0.487	-6.15329e-06
0.486	-6.21617e-06
0.485	-6.2806e-06
0.484	-6.34317e-06
0.483	-6.40653e-06
0.482	-6.47311e-06
0.481	-6.53821e-06
0.48	-6.61023e-06
0.479	-6.69742e-06
0.478	-6.77383e-06
0.477	-6.83201e-06
0.476	-6.88264e-06
0.475	-6.93523e-06
0.474	-6.98283e-06
0.473	-7.02985e-06
0.472	-7.08296e-06
0.471	-7.13869e-06
0.47	-7.19119e-06
0.469	-7.24436e-06
0.468	-7.30054e-06
0.467	-7.35772e-06
0.466	-7.42034e-06
0.465	-7.47696e-06
0.464	-7.52686e-06
0.463	-7.57695e-06
0.462	-7.62414e-06
0.461	-7.67954e-06
0.46	-7.73764e-06
0.459	-7.79591e-06
0.458	-7.83547e-06
0.457	-7.86341e-06
0.456	-7.88707e-06
0.455	-7.90947e-06
0.454	-7.92798e-06
0.453	-7.94491e-06
0.452	-7.9614e-06
0.451	-7.97329e-06
0.45	-7.98213e-06
0.449	-7.98597e-06
0.448	-7.98726e-06
0.447	-7.99073e-06
0.446	-7.9876e-06
0.445	-7.97359e-06
0.444	-7.95618e-06
0.443	-7.95589e-06
0.442	-7.93183e-06
0.441	-7.88624e-06
0.44	-7.81663e-06
0.439	-7.7365e-06
0.438	-7.64177e-06
0.437	-7.54092e-06
0.436	-7.4291e-06
0.435	-7.31462e-06
0.434	-7.20172e-06
0.433	-7.09044e-06
0.432	-6.97765e-06
0.431	-6.86393e-06
0.43	-6.75113e-06
0.429	-6.6472e-06
0.428	-6.55343e-06
0.427	-6.47004e-06
0.426	-6.3939e-06
0.425	-6.32748e-06
0.424	-6.27012e-06
0.423	-6.21729e-06
0.422	-6.1328e-06
0.421	-6.04246e-06
0.42	-5.95362e-06
0.419	-5.86785e-06
0.418	-5.77788e-06
0.417	-5.69036e-06
0.416	-5.60029e-06
0.415	-5.516e-06
0.414	-5.43232e-06
0.413	-5.34725e-06
0.412	-5.25442e-06
0.411	-5.16035e-06
0.41	-5.06795e-06
0.409	-4.98192e-06
0.408	-4.89765e-06
0.407	-4.81553e-06
0.406	-4.73585e-06
0.405	-4.65662e-06
0.404	-4.58258e-06
0.403	-4.51119e-06
0.402	-4.43938e-06
0.401	-4.36955e-06
0.4	-4.30044e-06
0.399	-4.23656e-06
0.398	-4.17468e-06
0.397	-4.11833e-06
0.396	-4.06599e-06
0.395	-4.01627e-06
0.394	-3.96601e-06
0.393	-3.91576e-06
0.392	-3.86528e-06
0.391	-3.83304e-06
0.39	-3.79093e-06
0.389	-3.74315e-06
0.388	-3.69315e-06
0.387	-3.64283e-06
0.386	-3.59981e-06
0.385	-3.55354e-06
0.384	-3.50908e-06
0.383	-3.46597e-06
0.382	-3.42059e-06
0.381	-3.3796e-06
0.38	-3.3432e-06
0.379	-3.31178e-06
0.378	-3.2879e-06
0.377	-3.2724e-06
0.376	-3.26196e-06
0.375	-3.26001e-06
0.374	-3.26364e-06
0.373	-3.27269e-06
0.372	-3.28642e-06
0.371	-3.30782e-06
0.37	-3.31126e-06
0.369	-3.3171e-06
0.368	-3.32927e-06
0.367	-3.3452e-06
0.366	-3.36322e-06
0.365	-3.37523e-06
0.364	-3.38925e-06
0.363	-3.40531e-06
0.362	-3.4183e-06
0.361	-3.43696e-06
0.36	-3.46058e-06
0.359	-3.48704e-06
0.358	-3.51446e-06
0.357	-3.55718e-06
0.356	-3.59178e-06
0.355	-3.62613e-06
0.354	-3.65703e-06
0.353	-3.68793e-06
0.352	-3.71824e-06
0.351	-3.75302e-06
0.35	-3.78944e-06
0.349	-3.82802e-06
0.348	-3.87044e-06
0.347	-3.91361e-06
0.346	-3.95764e-06
0.345	-4.00266e-06
0.344	-4.05054e-06
0.343	-4.1004e-06
0.342	-4.15031e-06
0.341	-4.20536e-06
0.34	-4.2652e-06
0.339	-4.32511e-06
0.338	-4.38599e-06
0.337	-4.45463e-06
0.336	-4.5082e-06
0.335	-4.56332e-06
0.334	-4.61786e-06
0.333	-4.67427e-06
0.332	-4.73159e-06
0.331	-4.79029e-06
0.33	-4.85065e-06
0.329	-4.91478e-06
0.328	-4.98046e-06
0.327	-5.04673e-06
0.326	-5.11237e-06
0.325	-5.17829e-06
0.324	-5.24394e-06
0.323	-5.30724e-06
0.322	-5.37299e-06
0.321	-5.4419e-06
0.32	-5.50846e-06
0.319	-5.59351e-06
0.318	-5.65227e-06
0.317	-5.66715e-06
0.316	-5.5582e-06
0.315	-5.60761e-06
0.314	-5.73471e-06
0.313	-5.90234e-06
0.312	-6.09987e-06
0.311	-6.31744e-06
0.31	-6.54351e-06
0.309	-6.769e-06
0.308	-6.9788e-06
0.307	-7.18637e-06
0.306	-7.36347e-06
0.305	-7.50652e-06
0.304	-7.61274e-06
0.303	-7.6819e-06
0.302	-7.71117e-06
0.301	-7.70319e-06
0.3	-7.64651e-06
0.299	-7.5384e-06
0.298	-7.34353e-06
0.297	-7.106e-06
0.296	-6.8806e-06
0.295	-6.85717e-06
0.294	-6.79713e-06
0.293	-6.72657e-06
0.292	-6.67518e-06
0.291	-6.63078e-06
0.29	-6.57747e-06
0.289	-6.5209e-06
0.288	-6.46677e-06
0.287	-6.41815e-06
0.286	-6.35078e-06
0.285	-6.28787e-06
0.284	-6.22838e-06
0.283	-6.17236e-06
0.282	-6.11792e-06
0.281	-6.06998e-06
0.28	-6.01779e-06
0.279	-5.96455e-06
0.278	-5.91295e-06
0.277	-5.86614e-06
0.276	-5.8298e-06
0.275	-5.79281e-06
0.274	-5.75552e-06
0.273	-5.7221e-06
0.272	-5.69469e-06
0.271	-5.65909e-06
0.27	-5.61475e-06
0.269	-5.57566e-06
0.268	-5.53798e-06
0.267	-5.4967e-06
0.266	-5.45736e-06
0.265	-5.42638e-06
0.264	-5.39369e-06
0.263	-5.35936e-06
0.262	-5.32494e-06
0.261	-5.2976e-06
0.26	-5.27363e-06
0.259	-5.25362e-06
0.258	-5.23604e-06
0.257	-5.22321e-06
0.256	-5.21222e-06
0.255	-5.19951e-06
0.254	-5.18963e-06
0.253	-5.1811e-06
0.252	-5.17527e-06
0.251	-5.17442e-06
0.25	-5.17612e-06
0.249	-5.17992e-06
0.248	-5.1811e-06
0.247	-5.18361e-06
0.246	-5.18411e-06
0.245	-5.18766e-06
0.244	-5.22621e-06
0.243	-5.22372e-06
0.242	-5.21674e-06
0.241	-5.20077e-06
0.24	-5.18487e-06
0.239	-5.1692e-06
0.238	-5.15121e-06
0.237	-5.13817e-06
0.236	-5.12901e-06
0.235	-5.11762e-06
0.234	-5.1078e-06
0.233	-5.10311e-06
0.232	-5.10989e-06
0.231	-5.1261e-06
0.23	-5.14791e-06
0.229	-5.17972e-06
0.228	-5.2189e-06
0.227	-5.26727e-06
0.226	-5.32437e-06
0.225	-5.39749e-06
0.224	-5.4854e-06
0.223	-5.52458e-06
0.222	-5.58225e-06
0.221	-5.63744e-06
0.22	-5.70087e-06
0.219	-5.76445e-06
0.218	-5.83214e-06
0.217	-5.90185e-06
0.216	-5.96709e-06
0.215	-6.02329e-06
0.214	-6.08284e-06
0.213	-6.14566e-06
0.212	-6.21464e-06
0.211	-6.28447e-06
0.21	-6.39495e-06
0.209	-6.54182e-06
0.208	-6.66277e-06
0.207	-6.74663e-06
0.206	-6.78668e-06
0.205	-6.78175e-06
0.204	-6.7282e-06
0.203	-6.62603e-06
0.202	-6.47621e-06
0.201	-6.28281e-06
0.2	-6.05051e-06
0.201	-5.78566e-06
0.202	-5.49541e-06
0.203	-5.18296e-06
0.204	-4.85883e-06
0.205	-4.53439e-06
0.206	-4.22298e-06
0.207	-3.93511e-06
0.208	-3.68584e-06
0.209	-3.48376e-06
0.21	-3.34464e-06
0.211	-3.21595e-06
0.212	-3.06454e-06
0.213	-2.9154e-06
0.214	-2.77688e-06
0.215	-2.63915e-06
0.216	-2.49875e-06
0.217	-2.35913e-06
0.218	-2.21992e-06
0.219	-2.07723e-06
0.22	-1.93308e-06
0.221	-1.79156e-06
0.222	-1.65479e-06
0.223	-1.5232e-06
0.224	-1.39354e-06
0.225	-1.26653e-06
0.226	-1.14392e-06
0.227	-1.02107e-06
0.228	-9.12233e-07
0.229	-8.05281e-07
0.23	-7.07437e-07
0.231	-6.15512e-07
0.232	-5.28188e-07
0.233	-4.45812e-07
0.234	-3.69906e-07
0.235	-2.86306e-07
0.236	-2.01709e-07
0.237	-1.1911e-07
0.238	-3.56127e-08
0.239	5.08329e-08
0.24	1.33595e-07
0.241	2.13211e-07
0.242	2.88873e-07
0.243	3.64709e-07
0.244	4.41084e-07
0.245	5.17533e-07
0.246	5.93577e-07
0.247	6.7006e-07
0.248	7.38211e-07
0.249	8.1537e-07
0.25	8.84832e-07
0.251	9.55842e-07
0.252	1.02597e-06
0.253	1.0947e-06
0.254	1.16217e-06
0.255	1.23057e-06
0.256	1.29725e-06
0.257	1.36409e-06
0.258	1.42675e-06
0.259	1.48903e-06
0.26	1.55099e-06
0.261	1.61085e-06
0.262	1.66386e-06
0.263	1.72208e-06
0.264	1.7797e-06
0.265	1.83911e-06
0.266	1.90044e-06
0.267	1.95804e-06
0.268	2.01234e-06
0.269	2.07547e-06
0.27	2.13642e-06
0.271	2.20496e-06
0.272	2.27402e-06
0.273	2.34415e-06
0.274	2.41195e-06
0.275	2.47753e-06
0.276	2.54047e-06
0.277	2.5996e-06
0.278	2.65707e-06
0.279	2.71401e-06
0.28	2.76568e-06
0.281	2.81092e-06
0.282	2.85359e-06
0.283	2.90154e-06
0.284	2.94408e-06
0.285	2.98398e-06
0.286	3.02248e-06
0.287	3.05908e-06
0.288	3.09931e-06
0.289	3.14881e-06
0.29	3.19489e-06
0.291	3.24427e-06
0.292	3.29314e-06
0.293	3.33887e-06
0.294	3.38597e-06
0.295	3.43174e-06
0.296	3.47757e-06
0.297	3.52199e-06
0.298	3.56801e-06
0.299	3.61236e-06
0.3	3.65523e-06
0.301	3.69833e-06
0.302	3.74398e-06
0.303	3.79023e-06
0.304	3.83316e-06
0.305	3.87712e-06
0.306	3.92061e-06
0.307	3.96651e-06
0.308	4.01161e-06
0.309	4.05571e-06
0.31	4.05046e-06
0.311	4.0484e-06
0.312	4.11958e-06
0.313	4.22147e-06
0.314	4.33774e-06
0.315	4.45738e-06
0.316	4.57502e-06
0.317	4.68577e-06
0.318	4.78953e-06
0.319	4.88407e-06
0.32	4.96299e-06
0.321	5.02925e-06
0.322	5.09311e-06
0.323	5.14469e-06
0.324	5.18121e-06
0.325	5.20618e-06
0.326	5.21617e-06
0.327	5.21129e-06
0.328	5.18936e-06
0.329	5.1485e-06
0.33	5.09312e-06
0.331	5.10226e-06
0.332	5.17106e-06
0.333	5.21898e-06
0.334	5.25885e-06
0.335	5.29732e-06
0.336	5.3312e-06
0.337	5.36581e-06
0.338	5.39763e-06
0.339	5.427e-06
0.34	5.45619e-06
0.341	5.48949e-06
0.342	5.53189e-06
0.343	5.56976e-06
0.344	5.60515e-06
0.345	5.63698e-06
0.346	5.66916e-06
0.347	5.69688e-06
0.348	5.72246e-06
0.349	5.73806e-06
0.35	5.7486e-06
0.351	5.76944e-06
0.352	5.79155e-06
0.353	5.81014e-06
0.354	5.82786e-06
0.355	5.8461e-06
0.356	5.86492e-06
0.357	5.87267e-06
0.358	5.86784e-06
0.359	5.85509e-06
0.36	5.83474e-06
0.361	5.8056e-06
0.362	5.77123e-06
0.363	5.73096e-06
0.364	5.68226e-06
0.365	5.62769e-06
0.366	5.56822e-06
0.367	5.50182e-06
0.368	5.43149e-06
0.369	5.35588e-06
0.37	5.28546e-06
0.371	5.22914e-06
0.372	5.1683e-06
0.373	5.10538e-06
0.374	5.04493e-06
0.375	4.98422e-06
0.376	4.91961e-06
0.377	4.84186e-06
0.378	4.76212e-06
0.379	4.67956e-06
0.38	4.59461e-06
0.381	4.50835e-06
0.382	4.42397e-06
0.383	4.33811e-06
0.384	4.25036e-06
0.385	4.16313e-06
0.386	4.07502e-06
0.387	3.98871e-06
0.388	3.90425e-06
0.389	3.82294e-06
0.39	3.74601e-06
0.391	3.67374e-06
0.392	3.6028e-06
0.393	3.53475e-06
0.394	3.46971e-06
0.395	3.40608e-06
0.396	3.34445e-06
0.397	3.28355e-06
0.398	3.2257e-06
0.399	3.1702e-06
0.4	3.11705e-06
0.401	3.06756e-06
0.402	3.01948e-06
0.403	2.97292e-06
0.404	2.92504e-06
0.405	2.88104e-06
0.406	2.84117e-06
0.407	2.80191e-06
0.408	2.76696e-06
0.409	2.73664e-06
0.41	2.70881e-06
0.411	2.68408e-06
0.412	2.6605e-06
0.413	2.63604e-06
0.414	2.61486e-06
0.415	2.59827e-06
0.416	2.58475e-06
0.417	2.57392e-06
0.418	2.56649e-06
0.419	2.56163e-06
0.42	2.55782e-06
0.421	2.55771e-06
0.422	2.55659e-06
0.423	2.55916e-06
0.424	2.55986e-06
0.425	2.5639e-06
0.426	2.57004e-06
0.427	2.57771e-06
0.428	2.58839e-06
0.429	2.59904e-06
0.43	2.61101e-06
0.431	2.62408e-06
0.432	2.63879e-06
0.433	2.65357e-06
0.434	2.67243e-06
0.435	2.69497e-06
0.436	2.71967e-06
0.437	2.74596e-06
0.438	2.77378e-06
0.439	2.80271e-06
0.44	2.83526e-06
0.441	2.87041e-06
0.442	2.90477e-06
0.443	2.94294e-06
0.444	2.98177e-06
0.445	3.02266e-06
0.446	3.06904e-06
0.447	3.11699e-06
0.448	3.16557e-06
0.449	3.21619e-06
0.45	3.26967e-06
0.451	3.32418e-06
0.452	3.38172e-06
0.453	3.43981e-06
0.454	3.50106e-06
0.455	3.56321e-06
0.456	3.62762e-06
0.457	3.69535e-06
0.458	3.76446e-06
0.459	3.8381e-06
0.46	3.91341e-06
0.461	3.98824e-06
0.462	4.06375e-06
0.463	4.14193e-06
0.464	4.22344e-06
0.465	4.30951e-06
0.466	4.38847e-06
0.467	4.47016e-06
0.468	4.55804e-06
0.469	4.64693e-06
0.47	4.73825e-06
0.471	4.8318e-06
0.472	4.92905e-06
0.473	5.03095e-06
0.474	5.13184e-06
0.475	5.23333e-06
0.476	5.33833e-06
0.477	5.44461e-06
0.478	5.55372e-06
0.479	5.66278e-06
0.48	5.77115e-06
0.481	5.88009e-06
0.482	5.98949e-06
0.483	6.0992e-06
0.484	6.21161e-06
0.485	6.32179e-06
0.486	6.42406e-06
0.487	6.53423e-06
0.488	6.64444e-06
0.489	6.75253e-06
0.49	6.85882e-06
0.491	6.96548e-06
0.492	7.07176e-06
0.493	7.17649e-06
0.494	7.27853e-06
0.495	7.37762e-06
0.496	7.47139e-06
0.497	7.56239e-06
0.498	7.64992e-06
0.499	7.73388e-06
0.5	7.81298e-06
0.501	7.8888e-06
0.502	7.96127e-06
0.503	8.03004e-06
0.504	8.0973e-06
0.505	8.15711e-06
0.506	8.21047e-06
0.507	8.26347e-06
0.508	8.30872e-06
0.509	8.34544e-06
0.51	8.37588e-06
0.511	8.40319e-06
0.512	8.42364e-06
0.513	8.44005e-06
0.514	8.45071e-06
0.515	8.45337e-06
0.516	8.45117e-06
0.517	8.44466e-06
0.518	8.43212e-06
0.519	8.41563e-06
0.52	8.39148e-06
0.521	8.36603e-06
0.522	8.33533e-06
0.523	8.30079e-06
0.524	8.26265e-06
0.525	8.22033e-06
0.526	8.17603e-06
0.527	8.12945e-06
0.528	8.07364e-06
0.529	8.01526e-06
0.53	7.95727e-06
0.531	7.89669e-06
0.532	7.8352e-06
0.533	7.77739e-06
0.534	7.71699e-06
0.535	7.65588e-06
0.536	7.59243e-06
0.537	7.52967e-06
0.538	7.46989e-06
0.539	7.41102e-06
0.54	7.35419e-06
0.541	7.29939e-06
0.542	7.24617e-06
0.543	7.19436e-06
0.544	7.14601e-06
0.545	7.1013e-06
0.546	7.05686e-06
0.547	7.01404e-06
0.548	6.97346e-06
0.549	6.93631e-06
0.55	6.90219e-06
0.551	6.86971e-06
0.552	6.84387e-06
0.553	6.81617e-06
0.554	6.78878e-06
0.555	6.7604e-06
0.556	6.73599e-06
0.557	6.71278e-06
0.558	6.69417e-06
0.559	6.67686e-06
0.56	6.66199e-06
0.561	6.65003e-06
0.562	6.64127e-06
0.563	6.63503e-06
0.564	6.63123e-06
0.565	6.62853e-06
0.566	6.62602e-06
0.567	6.62788e-06
0.568	6.63209e-06
0.569	6.63747e-06
0.57	6.64342e-06
0.571	6.65124e-06
0.572	6.66071e-06
0.573	6.66645e-06
0.574	6.67669e-06
0.575	6.68403e-06
0.576	6.69001e-06
0.577	6.69691e-06
0.578	6.70812e-06
0.579	6.71908e-06
0.58	6.73229e-06
0.581	6.74684e-06
0.582	6.76065e-06
0.583	6.77506e-06
0.584	6.79146e-06
0.585	6.80562e-06
0.586	6.81842e-06
0.587	6.83218e-06
0.588	6.84389e-06
0.589	6.85669e-06
0.59	6.87097e-06
0.591	6.88478e-06
0.592	6.89791e-06
0.593	6.91234e-06
0.594	6.92826e-06
0.595	6.94246e-06
0.596	6.9547e-06
0.597	6.97175e-06
0.598	6.98926e-06
0.599	7.00938e-06
0.6	7.02695e-06
0.601	7.04215e-06
0.602	7.05783e-06
0.603	7.07481e-06
0.604	7.09191e-06
0.605	7.10398e-06
0.606	7.1188e-06
0.607	7.1342e-06
0.608	7.15044e-06
0.609	7.16875e-06
0.61	7.18573e-06
0.611	7.20127e-06
0.612	7.21905e-06
0.613	7.23573e-06
0.614	7.25146e-06
0.615	7.26425e-06
0.616	7.27619e-06
0.617	7.29066e-06
0.618	7.30356e-06
0.619	7.31535e-06
0.62	7.32253e-06
0.621	7.3293e-06
0.622	7.33861e-06
0.623	7.34561e-06
0.624	7.35217e-06
0.625	7.35929e-06
0.626	7.36749e-06
0.627	7.37741e-06
0.628	7.38345e-06
0.629	7.38745e-06
0.63	7.39254e-06
0.631	7.39807e-06
0.632	7.40345e-06
0.633	7.4068e-06
0.634	7.4115e-06
0.635	7.41664e-06
0.636	7.42079e-06
0.637	7.42526e-06
0.638	7.42923e-06
0.639	7.43388e-06
0.64	7.43791e-06
0.641	7.44504e-06
0.642	7.44856e-06
0.643	7.4491e-06
0.644	7.44951e-06
0.645	7.4484e-06
0.646	7.44698e-06
0.647	7.44606e-06
0.648	7.43999e-06
0.649	7.43584e-06
0.65	7.43399e-06
0.651	7.43298e-06
0.652	7.4325e-06
0.653	7.43205e-06
0.654	7.43316e-06
0.655	7.43247e-06
0.656	7.43205e-06
0.657	7.4336e-06
0.658	7.43579e-06
0.659	7.43733e-06
0.66	7.44001e-06
0.661	7.44224e-06
0.662	7.43844e-06
0.663	7.43469e-06
0.664	7.42975e-06
0.665	7.42427e-06
0.666	7.41985e-06
0.667	7.41525e-06
0.668	7.40927e-06
0.669	7.40451e-06
0.67	7.40092e-06
0.671	7.39705e-06
0.672	7.39146e-06
0.673	7.38611e-06
0.674	7.38044e-06
0.675	7.37443e-06
0.676	7.36986e-06
0.677	7.3651e-06
0.678	7.3604e-06
0.679	7.35709e-06
0.68	7.35238e-06
0.681	7.34466e-06
0.682	7.33771e-06
0.683	7.33174e-06
0.684	7.32532e-06
0.685	7.31976e-06
0.686	7.31367e-06
0.687	7.30822e-06
0.688	7.30113e-06
0.689	7.29568e-06
0.69	7.29049e-06
0.691	7.2844e-06
0.692	7.27802e-06
0.693	7.27173e-06
0.694	7.26671e-06
0.695	7.26238e-06
0.696	7.25712e-06
0.697	7.25167e-06
0.698	7.24568e-06
0.699	7.23845e-06
0.7	7.22971e-06
0.701	7.22041e-06
0.702	7.21314e-06
0.703	7.20506e-06
0.704	7.19636e-06
0.705	7.18563e-06
0.706	7.17091e-06
0.707	7.1551e-06
0.708	7.13752e-06
0.709	7.12043e-06
0.71	7.10268e-06
0.711	7.08431e-06
0.712	7.06534e-06
0.713	7.04789e-06
0.714	7.03351e-06
0.715	7.01464e-06
0.716	6.99532e-06
0.717	6.97217e-06
0.718	6.94883e-06
0.719	6.92741e-06
0.72	6.90639e-06
0.721	6.88396e-06
0.722	6.86018e-06
0.723	6.83456e-06
0.724	6.80776e-06
0.725	6.77683e-06
0.726	6.74406e-06
0.727	6.71172e-06
0.728	6.68262e-06
0.729	6.65074e-06
0.73	6.61749e-06
0.731	6.58341e-06
0.732	6.54963e-06
0.733	6.51588e-06
0.734	6.48216e-06
0.735	6.44452e-06
0.736	6.40727e-06
0.737	6.36839e-06
0.738	6.3323e-06
0.739	6.29607e-06
0.74	6.25869e-06
0.741	6.21973e-06
0.742	6.17964e-06
0.743	6.14094e-06
0.744	6.10025e-06
0.745	6.05835e-06
0.746	6.01679e-06
0.747	5.97485e-06
0.748	5.93418e-06
0.749	5.88707e-06
0.75	5.8428e-06
0.751	5.79805e-06
0.752	5.75176e-06
0.753	5.70377e-06
0.754	5.65487e-06
0.755	5.60549e-06
0.756	5.55625e-06
0.757	5.50762e-06
0.758	5.45862e-06
0.759	5.40994e-06
0.76	5.36224e-06
0.761	5.31421e-06
0.762	5.26743e-06
0.763	5.2217e-06
0.764	5.17358e-06
0.765	5.12553e-06
0.766	5.07978e-06
0.767	5.03299e-06
0.768	4.98757e-06
0.769	4.94211e-06
0.77	4.8993e-06
0.771	4.85534e-06
0.772	4.81053e-06
0.773	4.76617e-06
0.774	4.72185e-06
0.775	4.67951e-06
0.776	4.6373e-06
0.777	4.59586e-06
0.778	4.55472e-06
0.779	4.51511e-06
0.78	4.477e-06
0.781	4.43942e-06
0.782	4.40315e-06
0.783	4.36746e-06
0.784	4.33066e-06
0.785	4.29531e-06
0.786	4.26085e-06
0.787	4.22665e-06
0.788	4.19408e-06
0.789	4.16133e-06
0.79	4.13e-06
0.791	4.10018e-06
0.792	4.07161e-06
0.793	4.0425e-06
0.794	4.0137e-06
0.795	3.98653e-06
0.796	3.95996e-06
0.797	3.93327e-06
0.798	3.90714e-06
0.799	3.88163e-06
0.8	3.85716e-06
0.801	3.83394e-06
0.802	3.81076e-06
0.803	3.78702e-06
0.804	3.76245e-06
0.805	3.74011e-06
0.806	3.71751e-06
0.807	3.69589e-06
0.808	3.67392e-06
0.809	3.65166e-06
0.81	3.63148e-06
0.811	3.6114e-06
0.812	3.59283e-06
0.813	3.57339e-06
0.814	3.55475e-06
0.815	3.53799e-06
0.816	3.52204e-06
0.817	3.50524e-06
0.818	3.49058e-06
0.819	3.47576e-06
0.82	3.46282e-06
0.821	3.45036e-06
0.822	3.43546e-06
0.823	3.42146e-06
0.824	3.40821e-06
0.825	3.39681e-06
0.826	3.38568e-06
0.827	3.37434e-06
0.828	3.36261e-06
0.829	3.35061e-06
0.83	3.3399e-06
0.831	3.32826e-06
0.832	3.31776e-06
0.833	3.30559e-06
0.834	3.29466e-06
0.835	3.28501e-06
0.836	3.27524e-06
0.837	3.26449e-06
0.838	3.25563e-06
0.839	3.24579e-06
0.84	3.23639e-06
0.841	3.22594e-06
0.842	3.2158e-06
0.843	3.20768e-06
0.844	3.19952e-06
0.845	3.19182e-06
0.846	3.18395e-06
0.847	3.17526e-06
0.848	3.1676e-06
0.849	3.15938e-06
0.85	3.15168e-06
0.851	3.14435e-06
0.852	3.13721e-06
0.853	3.12898e-06
0.854	3.12271e-06
0.855	3.1162e-06
0.856	3.10927e-06
0.857	3.10258e-06
0.858	3.09681e-06
0.859	3.08975e-06
0.86	3.08236e-06
0.861	3.07562e-06
0.862	3.07012e-06
0.863	3.06505e-06
0.864	3.05902e-06
0.865	3.05407e-06
0.866	3.04789e-06
0.867	3.04283e-06
0.868	3.0389e-06
0.869	3.03322e-06
0.87	3.02868e-06
0.871	3.02469e-06
0.872	3.01978e-06
0.873	3.01589e-06
0.874	3.0124e-06
0.875	3.00872e-06
0.876	3.00531e-06
0.877	3.0021e-06
0.878	2.99789e-06
0.879	2.99343e-06
0.88	2.98888e-06
0.881	2.98674e-06
0.882	2.9854e-06
0.883	2.98382e-06
0.884	2.98125e-06
0.885	2.97959e-06
0.886	2.97748e-06
0.887	2.97754e-06
0.888	2.97694e-06
0.889	2.97683e-06
0.89	2.97724e-06
0.891	2.97765e-06
0.892	2.97861e-06
0.893	2.98013e-06
0.894	2.98075e-06
0.895	2.98185e-06
0.896	2.98338e-06
0.897	2.98325e-06
0.898	2.98422e-06
0.899	2.9856e-06
0.9	2.98703e-06
0.901	2.99018e-06
0.902	2.99287e-06
0.903	2.99548e-06
0.904	2.99833e-06
0.905	3.00211e-06
0.906	3.00638e-06
0.907	3.01132e-06
0.908	3.01525e-06
0.909	3.01748e-06
0.91	3.02291e-06
0.911	3.02909e-06
0.912	3.03521e-06
0.913	3.04101e-06
0.914	3.04565e-06
0.915	3.0501e-06
0.916	3.05384e-06
0.917	3.0569e-06
0.918	3.06217e-06
0.919	3.06591e-06
0.92	3.0696e-06
0.921	3.07417e-06
0.922	3.07819e-06
0.923	3.08314e-06
0.924	3.08818e-06
0.925	3.09301e-06
0.926	3.09733e-06
0.927	3.10175e-06
0.928	3.10433e-06
0.929	3.10745e-06
0.93	3.11478e-06
0.931	3.11977e-06
0.932	3.1244e-06
0.933	3.12841e-06
0.934	3.13098e-06
0.935	3.13362e-06
0.936	3.13585e-06
0.937	3.13866e-06
0.938	3.14159e-06
0.939	3.14499e-06
0.94	3.14775e-06
0.941	3.1498e-06
0.942	3.15216e-06
0.943	3.15551e-06
0.944	3.15965e-06
0.945	3.16295e-06
0.946	3.16555e-06
0.947	3.16815e-06
0.948	3.17105e-06
0.949	3.17498e-06
0.95	3.17868e-06
0.951	3.18201e-06
0.952	3.18486e-06
0.953	3.18765e-06
0.954	3.18937e-06
0.955	3.19027e-06
0.956	3.19117e-06
0.957	3.19142e-06
0.958	3.19132e-06
0.959	3.19225e-06
0.96	3.19039e-06
0.961	3.18913e-06
0.962	3.18822e-06
0.963	3.18799e-06
0.964	3.18758e-06
0.965	3.18613e-06
0.966	3.18509e-06
0.967	3.18483e-06
0.968	3.18543e-06
0.969	3.18517e-06
0.97	3.18469e-06
0.971	3.1846e-06
0.972	3.18411e-06
0.973	3.1833e-06
0.974	3.18138e-06
0.975	3.17952e-06
0.976	3.17728e-06
0.977	3.17418e-06
0.978	3.17175e-06
0.979	3.1701e-06
0.98	3.16754e-06
0.981	3.16508e-06
0.982	3.16226e-06
0.983	3.16116e-06
0.984	3.15956e-06
0.985	3.15809e-06
0.986	3.15632e-06
0.987	3.1552e-06
0.988	3.15535e-06
0.989	3.15452e-06
0.99	3.15364e-06
0.991	3.15361e-06
0.992	3.15297e-06
0.993	3.15366e-06
0.994	3.15365e-06
0.995	3.15464e-06
0.996	3.15674e-06
0.997	3.15899e-06
0.998	3.16111e-06
0.999	3.16389e-06
1	3.16635e-06
1.001	3.16834e-06
1.002	3.1704e-06
1.003	3.17357e-06
1.004	3.17675e-06
1.005	3.17971e-06
1.006	3.1831e-06
1.007	3.18644e-06
1.008	3.19068e-06
1.009	3.19462e-06
1.01	3.19827e-06
1.011	3.20288e-06
1.012	3.20786e-06
1.013	3.21462e-06
1.014	3.22023e-06
1.015	3.22784e-06
1.016	3.23624e-06
1.017	3.24353e-06
1.018	3.2515e-06
1.019	3.26084e-06
1.02	3.27048e-06
1.021	3.2799e-06
1.022	3.2889e-06
1.023	3.298e-06
1.024	3.3068e-06
1.025	3.3151e-06
1.026	3.32298e-06
1.027	3.33051e-06
1.028	3.3392e-06
1.029	3.34707e-06
1.03	3.3547e-06
1.031	3.3635e-06
1.032	3.37181e-06
1.033	3.38193e-06
1.034	3.392e-06
1.035	3.40344e-06
1.036	3.41564e-06
1.037	3.42746e-06
1.038	3.44005e-06
1.039	3.45305e-06
1.04	3.46718e-06
1.041	3.48186e-06
1.042	3.49537e-06
1.043	3.5086e-06
1.044	3.52438e-06
1.045	3.53922e-06
1.046	3.55481e-06
1.047	3.57302e-06
1.048	3.59085e-06
1.049	3.6085e-06
1.05	3.62754e-06
1.051	3.64667e-06
1.052	3.66705e-06
1.053	3.68876e-06
1.054	3.70927e-06
1.055	3.73056e-06
1.056	3.7516e-06
1.057	3.77337e-06
1.058	3.79513e-06
1.059	3.81738e-06
1.06	3.84169e-06
1.061	3.86529e-06
1.062	3.88878e-06
1.063	3.91362e-06
1.064	3.939e-06
1.065	3.96485e-06
1.066	3.99361e-06
1.067	4.0226e-06
1.068	4.05077e-06
1.069	4.07936e-06
1.07	4.10876e-06
1.071	4.13844e-06
1.072	4.17152e-06
1.073	4.20187e-06
1.074	4.23266e-06
1.075	4.265e-06
1.076	4.29765e-06
1.077	4.33074e-06
1.078	4.36347e-06
1.079	4.39727e-06
1.08	4.43244e-06
1.081	4.46968e-06
1.082	4.50656e-06
1.083	4.54367e-06
1.084	4.58172e-06
1.085	4.62119e-06
1.086	4.66162e-06
1.087	4.70179e-06
1.088	4.74311e-06
1.089	4.78546e-06
1.09	4.82821e-06
1.091	4.87167e-06
1.092	4.91585e-06
1.093	4.96074e-06
1.094	5.00635e-06
1.095	5.05267e-06
1.096	5.09971e-06
1.097	5.14746e-06
1.098	5.19593e-06
1.099	5.24511e-06
1.1	5.00564e-06
1.099	4.84553e-06
1.098	4.69106e-06
1.097	4.54224e-06
1.096	4.39906e-06
1.095	4.26153e-06
1.094	4.12963e-06
1.093	4.00338e-06
1.092	3.88276e-06
1.091	3.76779e-06
1.09	3.65847e-06
1.089	3.56801e-06
1.088	3.47702e-06
1.087	3.3884e-06
1.086	3.30203e-06
1.085	3.21846e-06
1.084	3.13687e-06
1.083	3.05799e-06
1.082	2.98179e-06
1.081	2.90696e-06
1.08	2.83561e-06
1.079	2.76624e-06
1.078	2.69814e-06
1.077	2.63327e-06
1.076	2.56847e-06
1.075	2.50598e-06
1.074	2.44464e-06
1.073	2.38461e-06
1.072	2.32704e-06
1.071	2.271e-06
1.07	2.21636e-06
1.069	2.16198e-06
1.068	2.10896e-06
1.067	2.05835e-06
1.066	2.00658e-06
1.065	1.95555e-06
1.064	1.90672e-06
1.063	1.85973e-06
1.062	1.81247e-06
1.061	1.76622e-06
1.06	1.72183e-06
1.059	1.67703e-06
1.058	1.63325e-06
1.057	1.59135e-06
1.056	1.54926e-06
1.055	1.50739e-06
1.054	1.46553e-06
1.053	1.42466e-06
1.052	1.38513e-06
1.051	1.34572e-06
1.05	1.30738e-06
1.049	1.26993e-06
1.048	1.23317e-06
1.047	1.19663e-06
1.046	1.15934e-06
1.045	1.12358e-06
1.044	1.09051e-06
1.043	1.05787e-06
1.042	1.02472e-06
1.041	9.94281e-07
1.04	9.64718e-07
1.039	9.3533e-07
1.038	9.07384e-07
1.037	8.79976e-07
1.036	8.52078e-07
1.035	8.25438e-07
1.034	7.98793e-07
1.033	7.72232e-07
1.032	7.47054e-07
1.031	7.21651e-07
1.03	6.97069e-07
1.029	6.73494e-07
1.028	6.48756e-07
1.027	6.24573e-07
1.026	6.0167e-07
1.025	5.78282e-07
1.024	5.55585e-07
1.023	5.3333e-07
1.022	5.11178e-07
1.021	4.90123e-07
1.02	4.69337e-07
1.019	4.49321e-07
1.018	4.30097e-07
1.017	4.11139e-07
1.016	3.91938e-07
1.015	3.74199e-07
1.014	3.56695e-07
1.013	3.40236e-07
1.012	3.2478e-07
1.011	3.09661e-07
1.01	2.95533e-07
1.009	2.81532e-07
1.008	2.67038e-07
1.007	2.53865e-07
1.006	2.40954e-07
1.005	2.27554e-07
1.004	2.15312e-07
1.003	2.02893e-07
1.002	1.91362e-07
1.001	1.80002e-07
1	1.68697e-07
0.999	1.58175e-07
0.998	1.47346e-07
0.997	1.36788e-07
0.996	1.26167e-07
0.995	1.17175e-07
0.994	1.08097e-07
0.993	9.93249e-08
0.992	9.09074e-08
0.991	8.3321e-08
0.99	7.55618e-08
0.989	6.76252e-08
0.988	5.96577e-08
0.987	5.28187e-08
0.986	4.60668e-08
0.985	4.04186e-08
0.984	3.47945e-08
0.983	2.90097e-08
0.982	2.50879e-08
0.981	2.02655e-08
0.98	1.56733e-08
0.979	1.17548e-08
0.978	7.14773e-09
0.977	3.8402e-09
0.976	5.33544e-10
0.975	-1.89213e-09
0.974	-5.7559e-09
0.973	-9.28605e-09
0.972	-1.26923e-08
0.971	-1.56257e-08
0.97	-1.88295e-08
0.969	-2.18183e-08
0.968	-2.37205e-08
0.967	-2.53703e-08
0.966	-2.72679e-08
0.965	-2.83507e-08
0.964	-3.05531e-08
0.963	-3.24053e-08
0.962	-3.42984e-08
0.961	-3.68827e-08
0.96	-3.77607e-08
0.959	-3.87459e-08
0.958	-3.97575e-08
0.957	-3.98905e-08
0.956	-4.05946e-08
0.955	-4.13351e-08
0.954	-4.29547e-08
0.953	-4.42888e-08
0.952	-4.51095e-08
0.951	-4.46e-08
0.95	-4.37211e-08
0.949	-4.27022e-08
0.948	-4.14313e-08
0.947	-4.08314e-08
0.946	-3.97823e-08
0.945	-3.88769e-08
0.944	-3.89452e-08
0.943	-3.8461e-08
0.942	-3.80394e-08
0.941	-3.68985e-08
0.94	-3.44702e-08
0.939	-3.40291e-08
0.938	-3.22223e-08
0.937	-3.12039e-08
0.936	-3.01594e-08
0.935	-2.89559e-08
0.934	-2.83208e-08
0.933	-2.70208e-08
0.932	-2.51213e-08
0.931	-2.31652e-08
0.93	-2.13387e-08
0.929	-2.00622e-08
0.928	-1.82712e-08
0.927	-1.68757e-08
0.926	-1.5168e-08
0.925	-1.38295e-08
0.924	-1.24334e-08
0.923	-1.07062e-08
0.922	-8.9365e-09
0.921	-6.93449e-09
0.92	-5.92067e-09
0.919	-5.03572e-09
0.918	-3.17882e-09
0.917	-1.81675e-09
0.916	-6.17712e-10
0.915	4.06528e-10
0.914	1.43548e-09
0.913	2.96105e-09
0.912	5.21786e-09
0.911	6.57685e-09
0.91	7.93478e-09
0.909	9.02253e-09
0.908	1.10896e-08
0.907	1.24734e-08
0.906	1.39894e-08
0.905	1.49917e-08
0.904	1.62239e-08
0.903	1.75369e-08
0.902	1.91043e-08
0.901	2.00949e-08
0.9	2.0588e-08
0.899	2.10643e-08
0.898	2.13622e-08
0.897	2.19635e-08
0.896	2.16461e-08
0.895	2.22221e-08
0.894	2.27116e-08
0.893	2.36986e-08
0.892	2.461e-08
0.891	2.41359e-08
0.89	2.40763e-08
0.889	2.44092e-08
0.888	2.48494e-08
0.887	2.47835e-08
0.886	2.45105e-08
0.885	2.38686e-08
0.884	2.43268e-08
0.883	2.50866e-08
0.882	2.50472e-08
0.881	2.51068e-08
0.88	2.47777e-08
0.879	2.43547e-08
0.878	2.43118e-08
0.877	2.39828e-08
0.876	2.37322e-08
0.875	2.43646e-08
0.874	2.34575e-08
0.873	2.42512e-08
0.872	2.40835e-08
0.871	2.25832e-08
0.87	2.16906e-08
0.869	2.11594e-08
0.868	2.05176e-08
0.867	1.99889e-08
0.866	1.93368e-08
0.865	1.78934e-08
0.864	1.79112e-08
0.863	1.7257e-08
0.862	1.64111e-08
0.861	1.63981e-08
0.86	1.55013e-08
0.859	1.50922e-08
0.858	1.41505e-08
0.857	1.27151e-08
0.856	1.17393e-08
0.855	1.04057e-08
0.854	8.97014e-09
0.853	8.76807e-09
0.852	7.48346e-09
0.851	5.9112e-09
0.85	5.75555e-09
0.849	5.61246e-09
0.848	5.38115e-09
0.847	4.64517e-09
0.846	4.07395e-09
0.845	2.12406e-09
0.844	1.58087e-09
0.843	6.95763e-10
0.842	-7.61869e-10
0.841	-1.80499e-09
0.84	-3.27244e-09
0.839	-4.14231e-09
0.838	-6.16977e-09
0.837	-8.28232e-09
0.836	-9.40253e-09
0.835	-1.09065e-08
0.834	-1.15685e-08
0.833	-1.29599e-08
0.832	-1.34368e-08
0.831	-1.47761e-08
0.83	-1.56985e-08
0.829	-1.65812e-08
0.828	-1.72017e-08
0.827	-1.9e-08
0.826	-2.07501e-08
0.825	-2.26458e-08
0.824	-2.5011e-08
0.823	-2.6875e-08
0.822	-2.88763e-08
0.821	-3.00106e-08
0.82	-3.2021e-08
0.819	-3.30733e-08
0.818	-3.46597e-08
0.817	-3.64465e-08
0.816	-3.81244e-08
0.815	-4.01014e-08
0.814	-4.19109e-08
0.813	-4.40358e-08
0.812	-4.6006e-08
0.811	-4.88762e-08
0.81	-5.04991e-08
0.809	-5.21825e-08
0.808	-5.46775e-08
0.807	-5.77551e-08
0.806	-6.04762e-08
0.805	-6.22205e-08
0.804	-6.55452e-08
0.803	-6.84043e-08
0.802	-7.13423e-08
0.801	-7.41897e-08
0.8	-7.69704e-08
0.799	-7.91638e-08
0.798	-8.18306e-08
0.797	-8.5428e-08
0.796	-8.81225e-08
0.795	-9.0996e-08
0.794	-9.41649e-08
0.793	-9.71575e-08
0.792	-1.00807e-07
0.791	-1.04195e-07
0.79	-1.06634e-07
0.789	-1.10709e-07
0.788	-1.14841e-07
0.787	-1.18845e-07
0.786	-1.23026e-07
0.785	-1.27069e-07
0.784	-1.33074e-07
0.783	-1.3842e-07
0.782	-1.43094e-07
0.781	-1.48474e-07
0.78	-1.53839e-07
0.779	-1.59333e-07
0.778	-1.65832e-07
0.777	-1.73255e-07
0.776	-1.79851e-07
0.775	-1.86965e-07
0.774	-1.94358e-07
0.773	-2.0174e-07
0.772	-2.10035e-07
0.771	-2.17726e-07
0.77	-2.25481e-07
0.769	-2.3466e-07
0.768	-2.43079e-07
0.767	-2.52302e-07
0.766	-2.61542e-07
0.765	-2.71496e-07
0.764	-2.81937e-07
0.763	-2.92059e-07
0.762	-3.02769e-07
0.761	-3.13979e-07
0.76	-3.25508e-07
0.759	-3.38114e-07
0.758	-3.51639e-07
0.757	-3.65612e-07
0.756	-3.79306e-07
0.755	-3.92975e-07
0.754	-4.07598e-07
0.753	-4.21882e-07
0.752	-4.37575e-07
0.751	-4.52981e-07
0.75	-4.68353e-07
0.749	-4.85815e-07
0.748	-5.03462e-07
0.747	-5.2214e-07
0.746	-5.41977e-07
0.745	-5.6031e-07
0.744	-5.80132e-07
0.743	-6.01718e-07
0.742	-6.2465e-07
0.741	-6.47574e-07
0.74	-6.71571e-07
0.739	-6.95795e-07
0.738	-7.201e-07
0.737	-7.45028e-07
0.736	-7.69889e-07
0.735	-7.94162e-07
0.734	-8.1898e-07
0.733	-8.4391e-07
0.732	-8.70181e-07
0.731	-8.96636e-07
0.73	-9.25792e-07
0.729	-9.55395e-07
0.728	-9.85671e-07
0.727	-1.01593e-06
0.726	-1.04755e-06
0.725	-1.08029e-06
0.724	-1.11669e-06
0.723	-1.1545e-06
0.722	-1.1921e-06
0.721	-1.23017e-06
0.72	-1.26949e-06
0.719	-1.30885e-06
0.718	-1.34851e-06
0.717	-1.38919e-06
0.716	-1.42977e-06
0.715	-1.47086e-06
0.714	-1.51179e-06
0.713	-1.55365e-06
0.712	-1.59658e-06
0.711	-1.64071e-06
0.71	-1.68611e-06
0.709	-1.73012e-06
0.708	-1.77502e-06
0.707	-1.82106e-06
0.706	-1.86785e-06
0.705	-1.9151e-06
0.704	-1.9654e-06
0.703	-2.01714e-06
0.702	-2.06941e-06
0.701	-2.12355e-06
0.7	-2.17913e-06
0.699	-2.23368e-06
0.698	-2.28827e-06
0.697	-2.3433e-06
0.696	-2.39936e-06
0.695	-2.45553e-06
0.694	-2.51173e-06
0.693	-2.5687e-06
0.692	-2.62718e-06
0.691	-2.68552e-06
0.69	-2.74495e-06
0.689	-2.80318e-06
0.688	-2.86057e-06
0.687	-2.92029e-06
0.686	-2.9799e-06
0.685	-3.04164e-06
0.684	-3.10644e-06
0.683	-3.17131e-06
0.682	-3.2363e-06
0.681	-3.30154e-06
0.68	-3.36762e-06
0.679	-3.43297e-06
0.678	-3.49755e-06
0.677	-3.56507e-06
0.676	-3.63202e-06
0.675	-3.69867e-06
0.674	-3.7669e-06
0.673	-3.83512e-06
0.672	-3.90186e-06
0.671	-3.97066e-06
0.67	-4.04003e-06
0.669	-4.10827e-06
0.668	-4.17742e-06
0.667	-4.24847e-06
0.666	-4.31916e-06
0.665	-4.38759e-06
0.664	-4.4581e-06
0.663	-4.52836e-06
0.662	-4.59838e-06
0.661	-4.66811e-06
0.66	-4.7393e-06
0.659	-4.81045e-06
0.658	-4.88116e-06
0.657	-4.95313e-06
0.656	-5.02282e-06
0.655	-5.09497e-06
0.654	-5.16802e-06
0.653	-5.2401e-06
0.652	-5.31167e-06
0.651	-5.38569e-06
0.65	-5.45588e-06
0.649	-5.53065e-06
0.648	-5.60512e-06
0.647	-5.67781e-06
0.646	-5.7487e-06
0.645	-5.81941e-06
0.644	-5.89082e-06
0.643	-5.96068e-06
0.642	-6.02987e-06
0.641	-6.09707e-06
0.64	-6.16392e-06
0.639	-6.22975e-06
0.638	-6.29502e-06
0.637	-6.35939e-06
0.636	-6.42346e-06
0.635	-6.48625e-06
0.634	-6.54796e-06
0.633	-6.60809e-06
0.632	-6.66769e-06
0.631	-6.72583e-06
0.63	-6.78349e-06
0.629	-6.84333e-06
0.628	-6.89948e-06
0.627	-6.95372e-06
0.626	-7.00833e-06
0.625	-7.0628e-06
0.624	-7.11549e-06
0.623	-7.16655e-06
0.622	-7.21621e-06
0.621	-7.2655e-06
0.62	-7.31439e-06
0.619	-7.36301e-06
0.618	-7.41007e-06
0.617	-7.45637e-06
0.616	-7.50096e-06
0.615	-7.54438e-06
0.614	-7.58758e-06
0.613	-7.63071e-06
0.612	-7.67221e-06
0.611	-7.71145e-06
0.61	-7.75039e-06
0.609	-7.78872e-06
0.608	-7.82657e-06
0.607	-7.86327e-06
0.606	-7.89988e-06
0.605	-7.93356e-06
0.604	-7.96698e-06
0.603	-7.99876e-06
0.602	-8.03032e-06
0.601	-8.05979e-06
0.6	-8.08812e-06
0.599	-8.11406e-06
0.598	-8.13623e-06
0.597	-8.15822e-06
0.596	-8.17708e-06
0.595	-8.19374e-06
0.594	-8.20945e-06
0.593	-8.22271e-06
0.592	-8.23356e-06
0.591	-8.24326e-06
0.59	-8.25157e-06
0.589	-8.25914e-06
0.588	-8.2641e-06
0.587	-8.26679e-06
0.586	-8.26879e-06
0.585	-8.26768e-06
0.584	-8.26728e-06
0.583	-8.26399e-06
0.582	-8.25832e-06
0.581	-8.25089e-06
0.58	-8.24187e-06
0.579	-8.2292e-06
0.578	-8.20989e-06
0.577	-8.19725e-06
0.576	-8.18253e-06
0.575	-8.1663e-06
0.574	-8.14794e-06
0.573	-8.12709e-06
0.572	-8.10492e-06
0.571	-8.08262e-06
0.57	-8.05992e-06
0.569	-8.03643e-06
0.568	-8.01203e-06
0.567	-7.98577e-06
0.566	-7.9609e-06
0.565	-7.9343e-06
0.564	-7.90671e-06
0.563	-7.87803e-06
0.562	-7.84788e-06
0.561	-7.81519e-06
0.56	-7.78144e-06
0.559	-7.74695e-06
0.558	-7.71045e-06
0.557	-7.68085e-06
0.556	-7.64581e-06
0.555	-7.60748e-06
0.554	-7.56789e-06
0.553	-7.52692e-06
0.552	-7.48648e-06
0.551	-7.44958e-06
0.55	-7.41017e-06
0.549	-7.36893e-06
0.548	-7.32748e-06
0.547	-7.28317e-06
0.546	-7.23915e-06
0.545	-7.19338e-06
0.544	-7.14585e-06
0.543	-7.09834e-06
0.542	-7.04832e-06
0.541	-6.99702e-06
0.54	-6.94744e-06
0.539	-6.89737e-06
0.538	-6.84654e-06
0.537	-6.79785e-06
0.536	-6.75149e-06
0.535	-6.70531e-06
0.534	-6.65986e-06
0.533	-6.61873e-06
0.532	-6.57887e-06
0.531	-6.54043e-06
0.53	-6.5075e-06
0.529	-6.47901e-06
0.528	-6.45267e-06
0.527	-6.4284e-06
[truncated: 4,826 more rows]
